# Supplementary material
Source: PubMed Central journal article supplement (PMC7087352)
Supplement: NIHMS1063345-supplement-1.pdf [file NIHMS1063345-supplement-1.pdf]

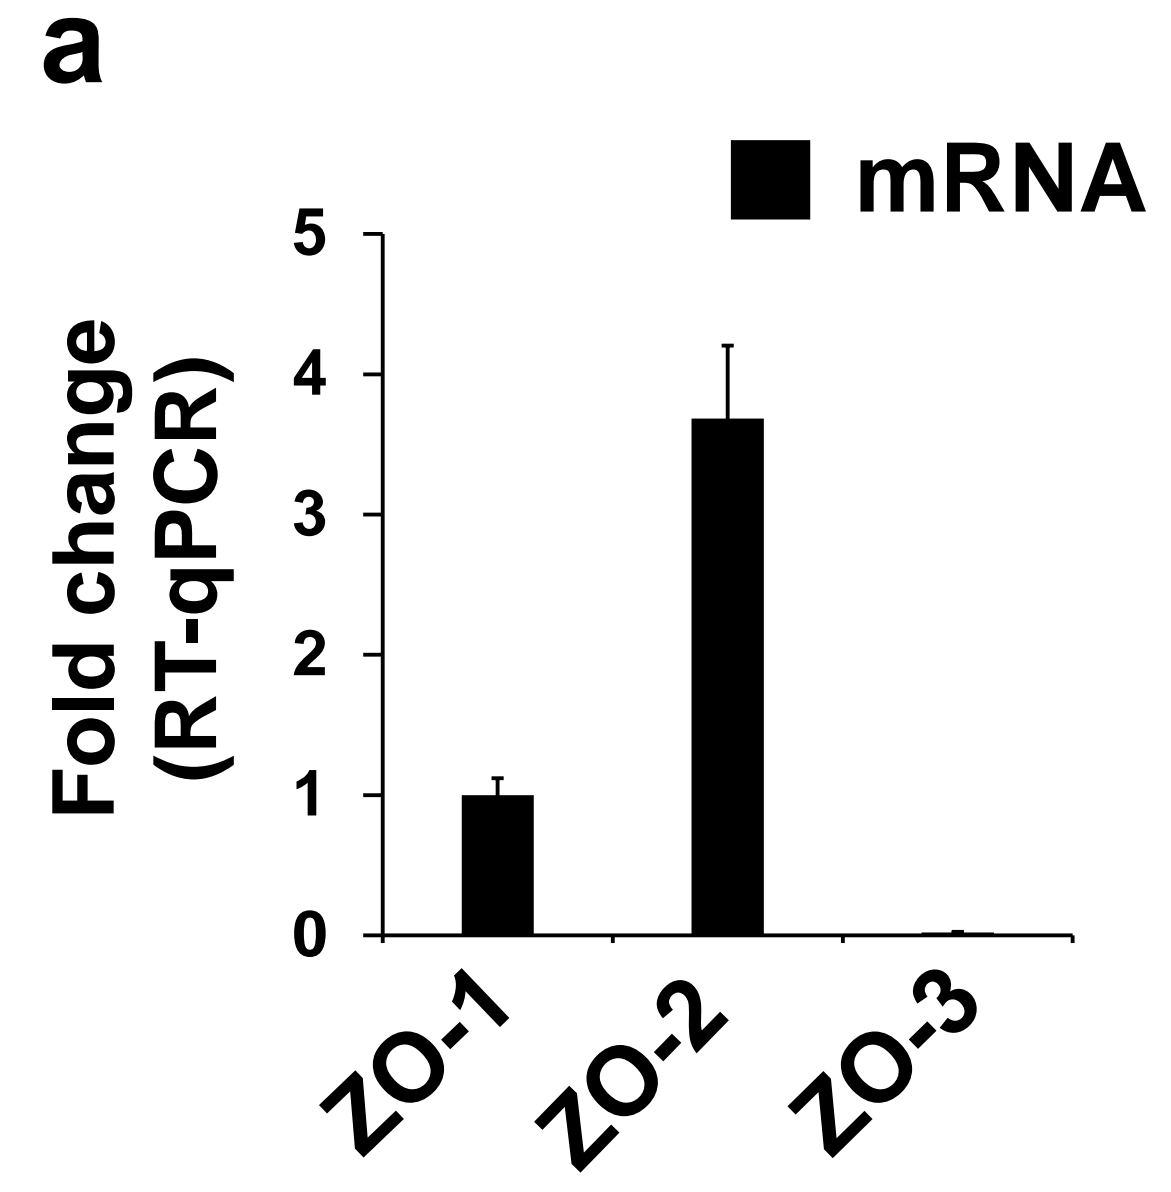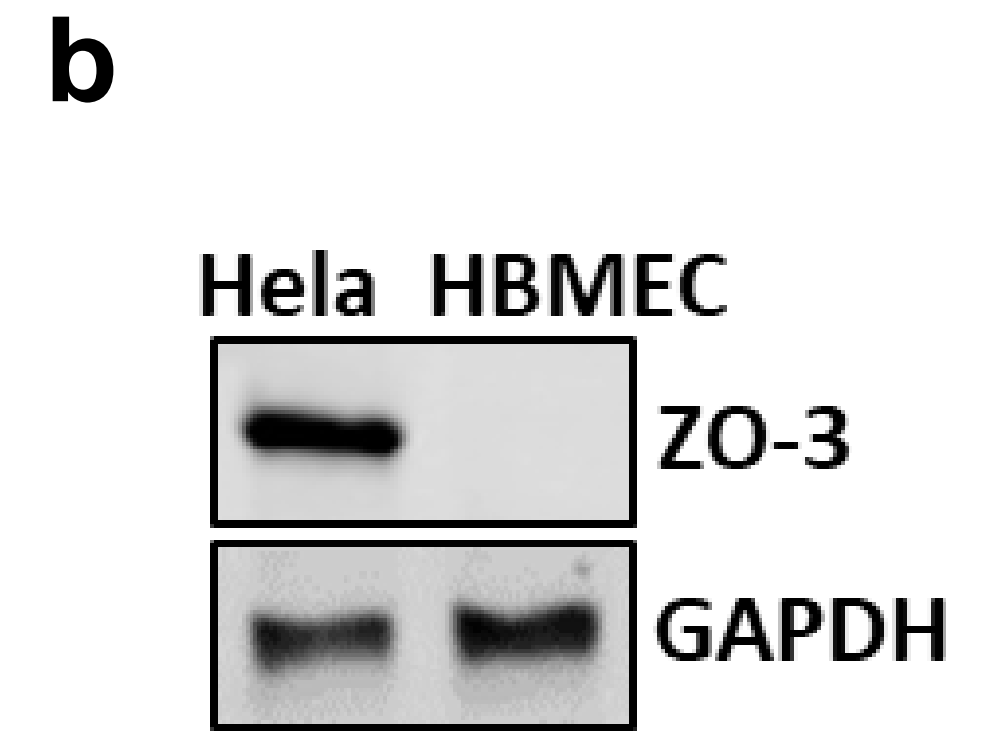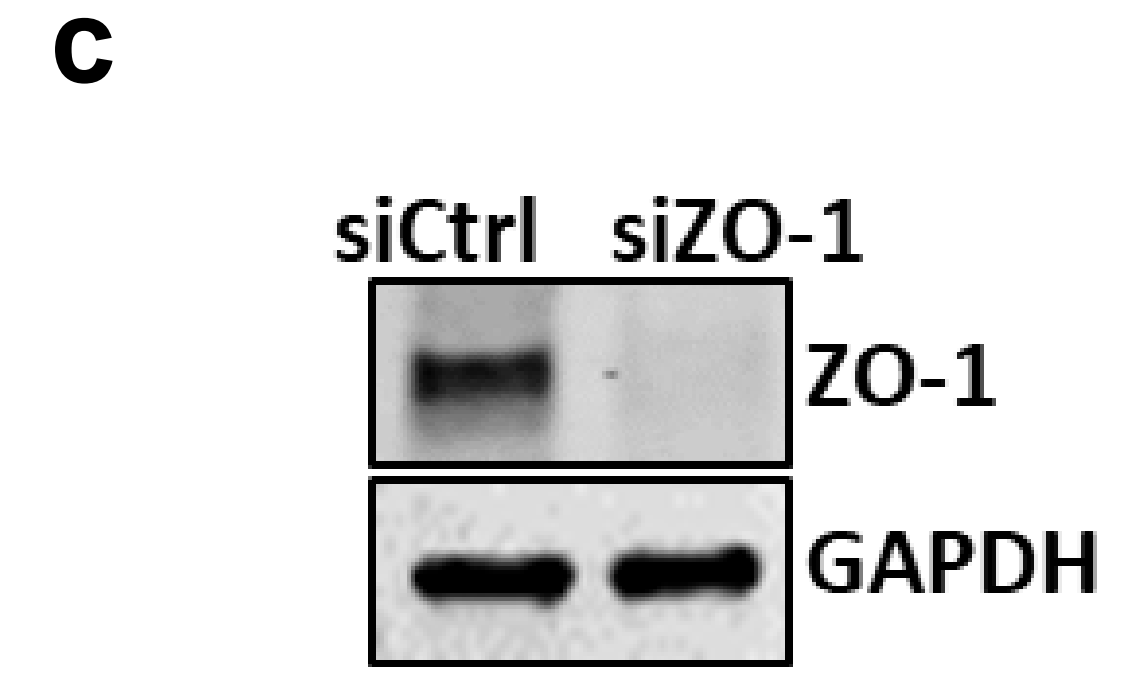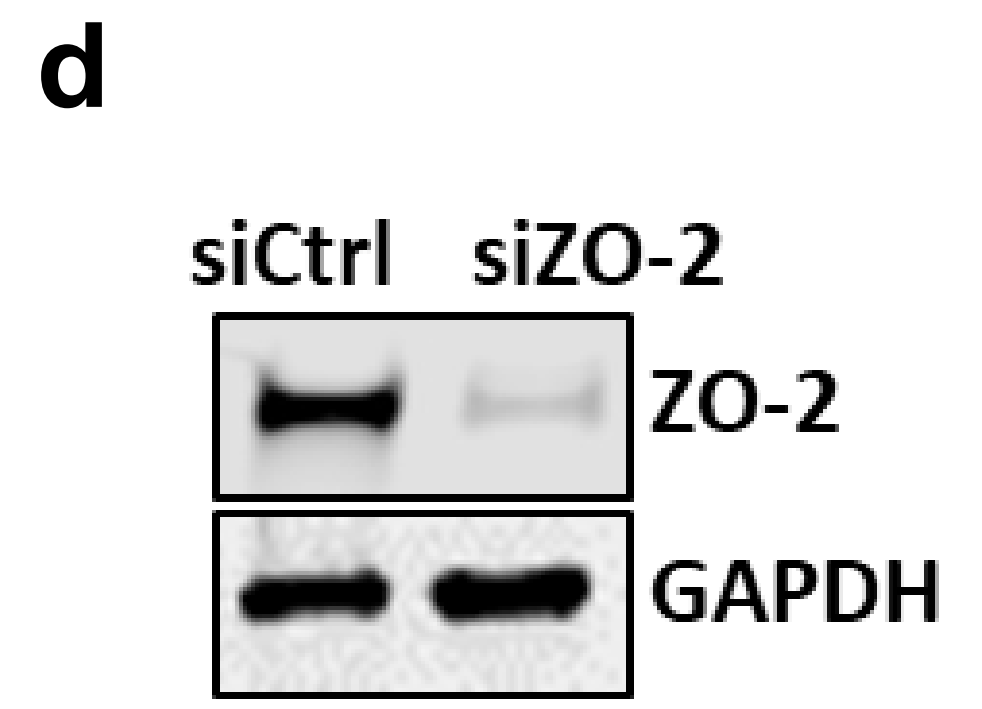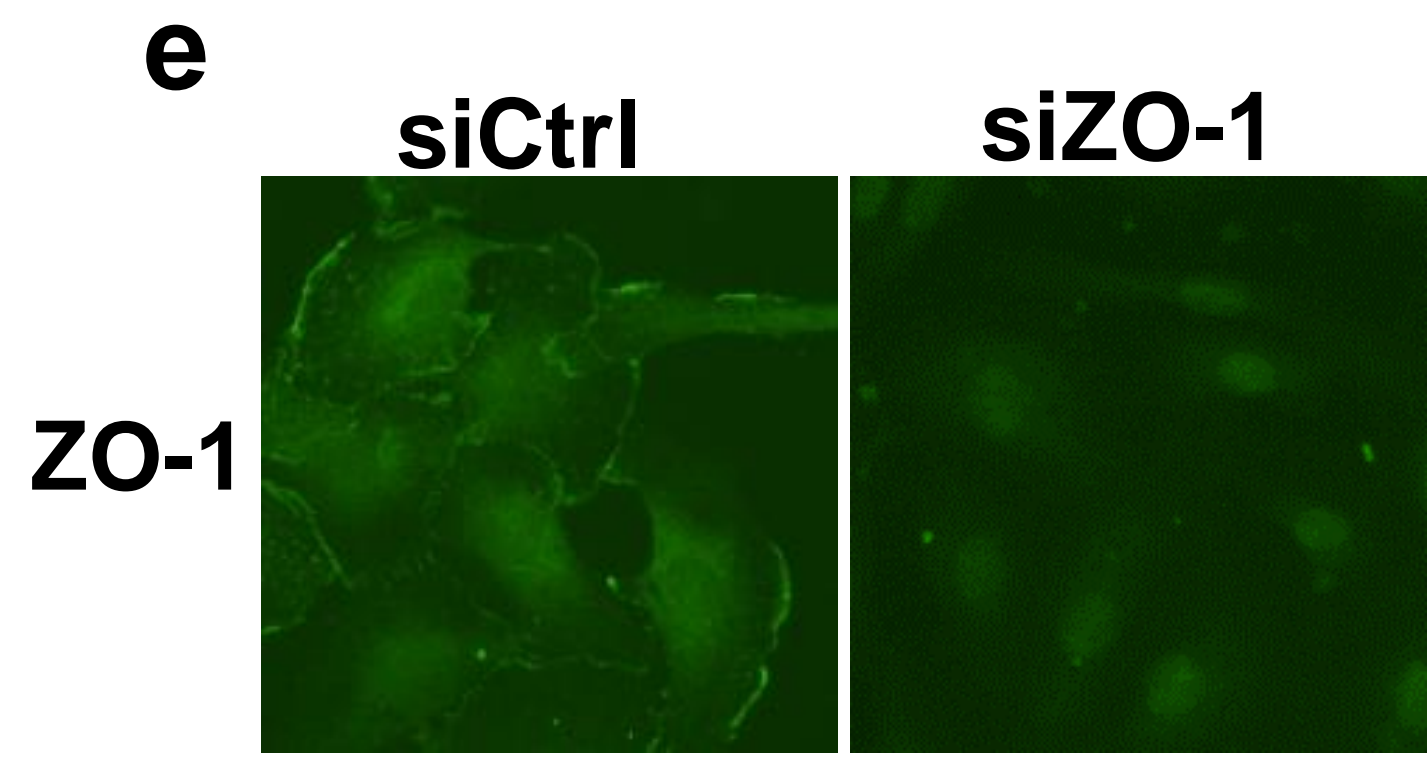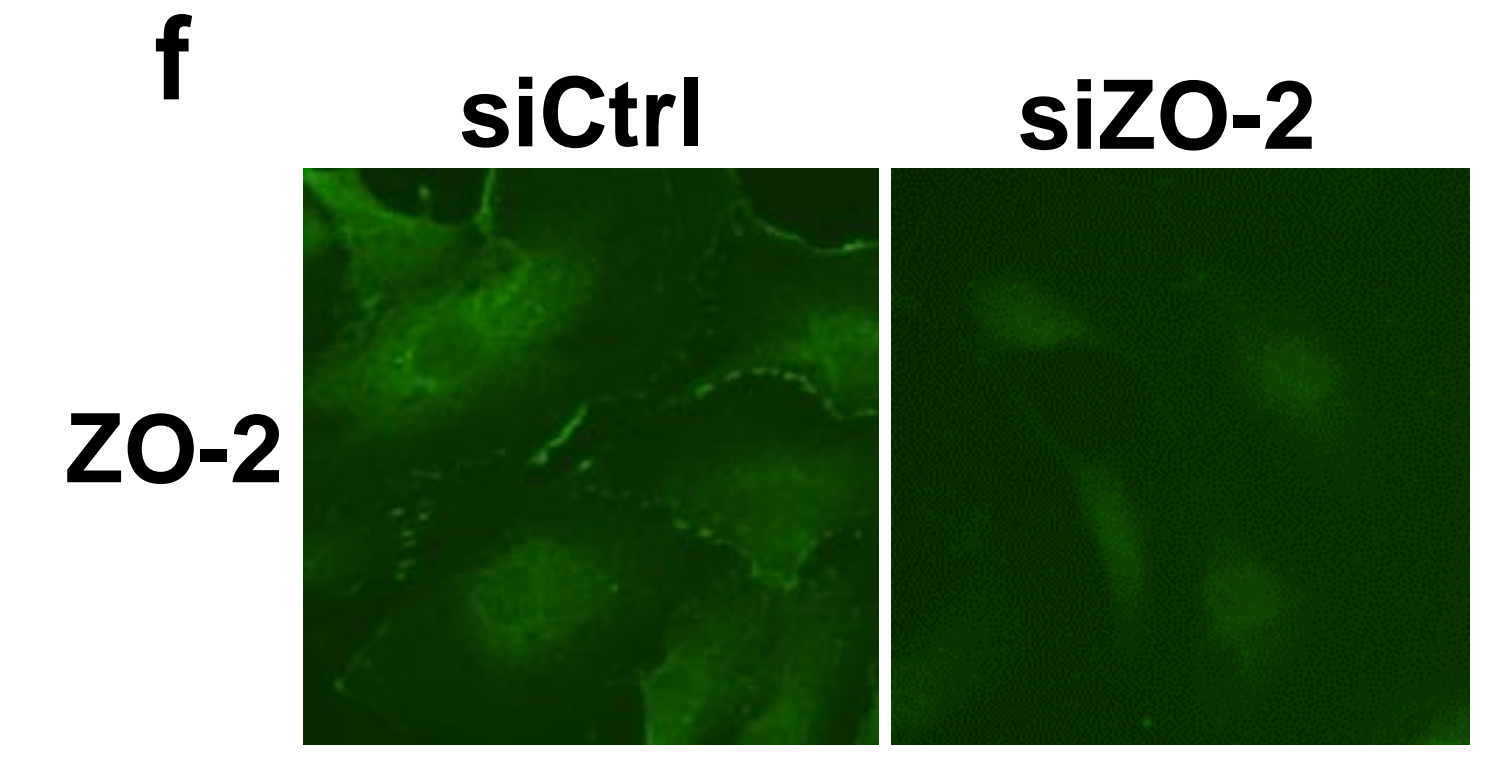

**Supplemental Figure 1. ZO-1/2 but not ZO-3 is expressed in HBMECs**

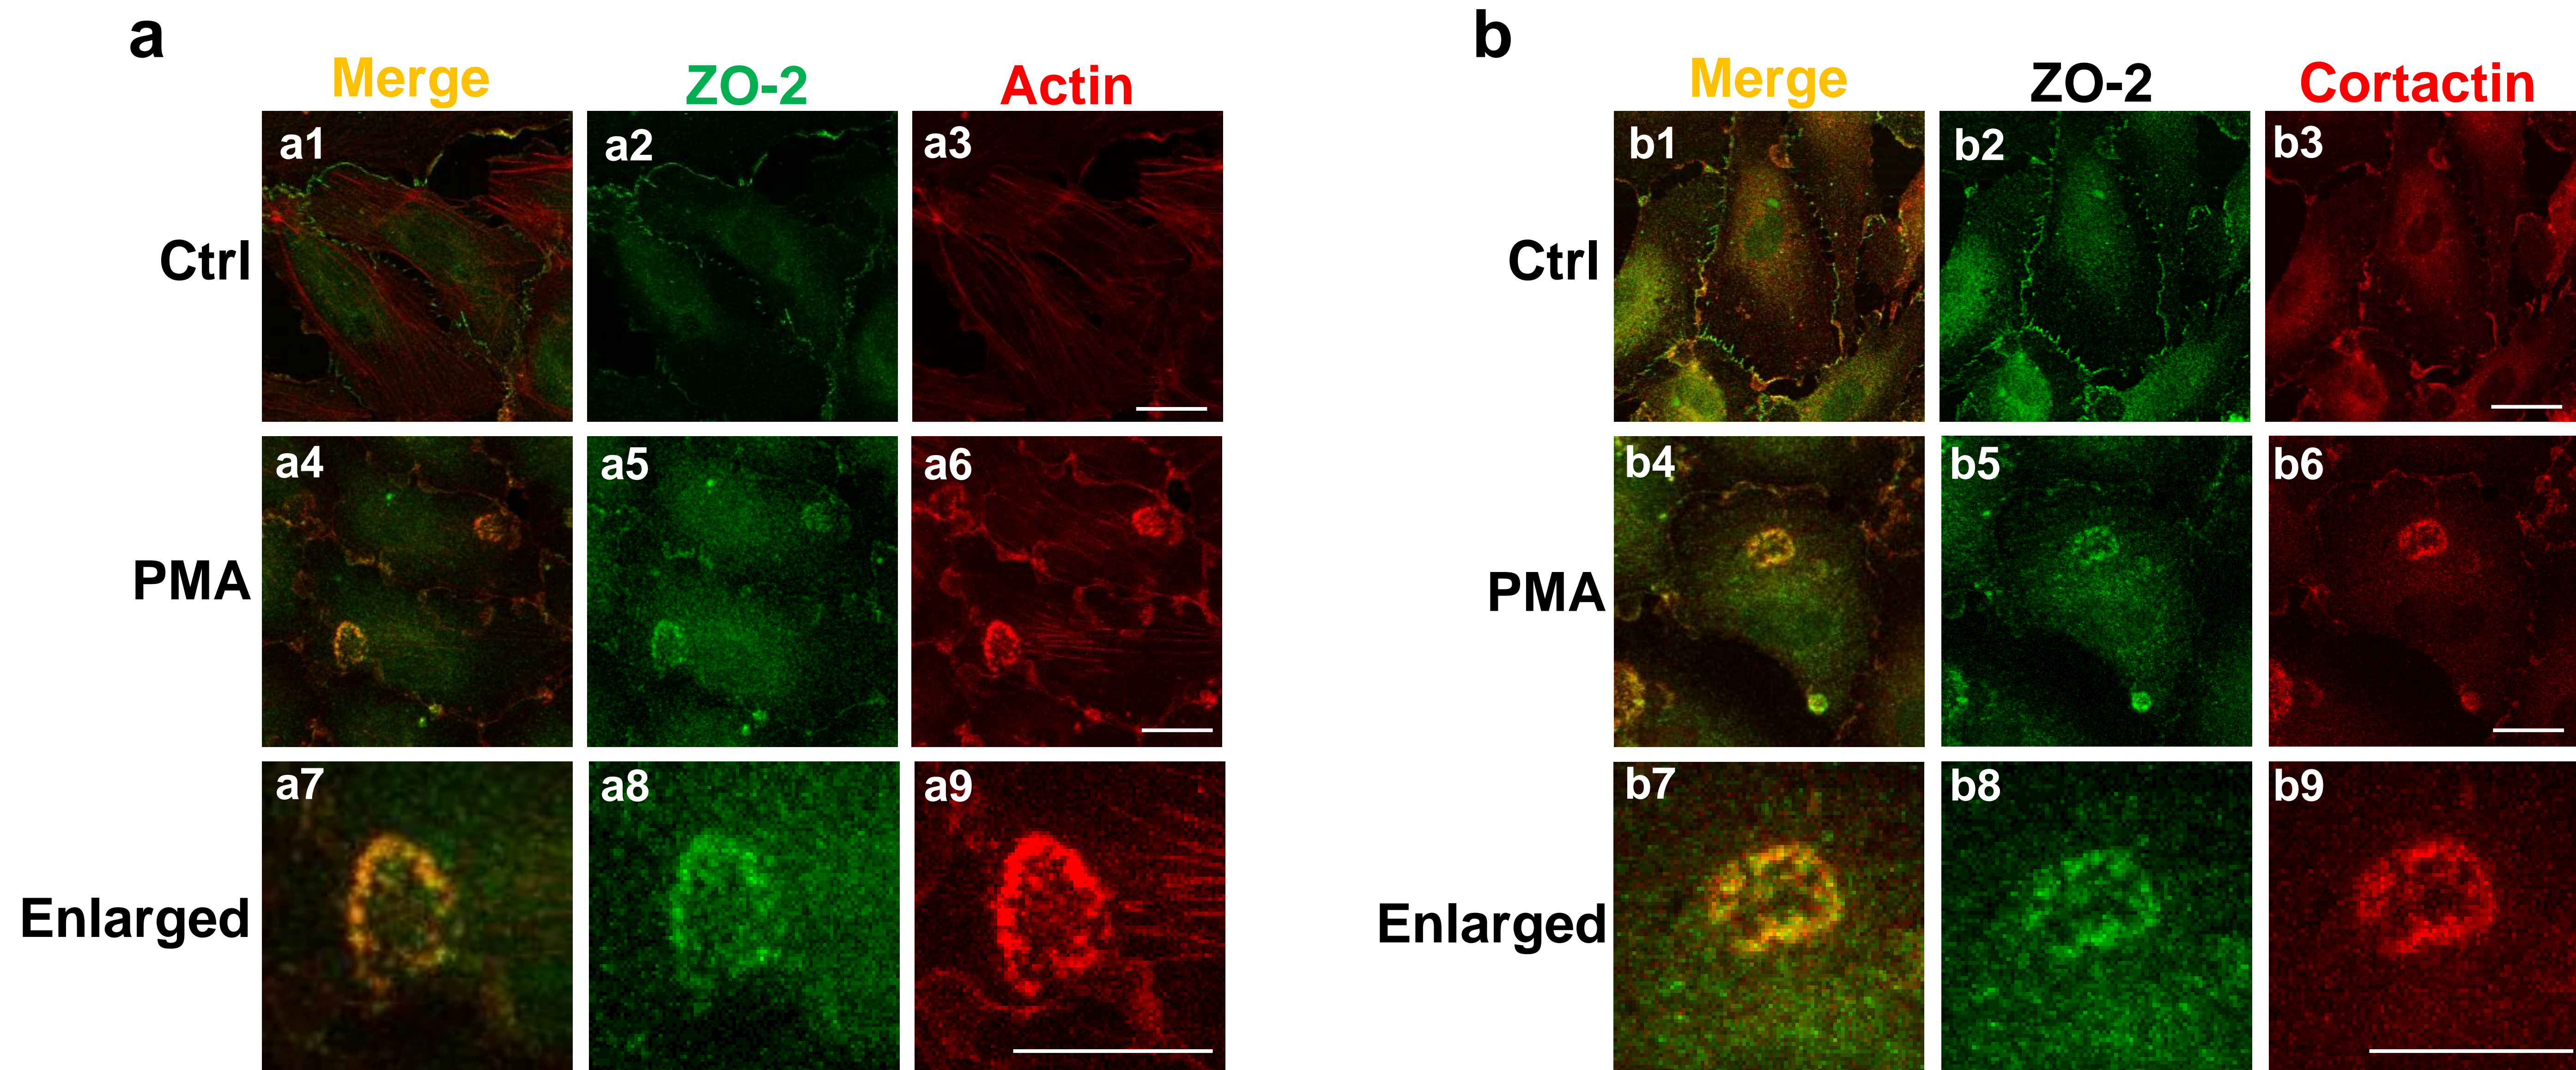

**Supplemental Figure 2. ZO-2 localizes at podosomes in HBMECs**

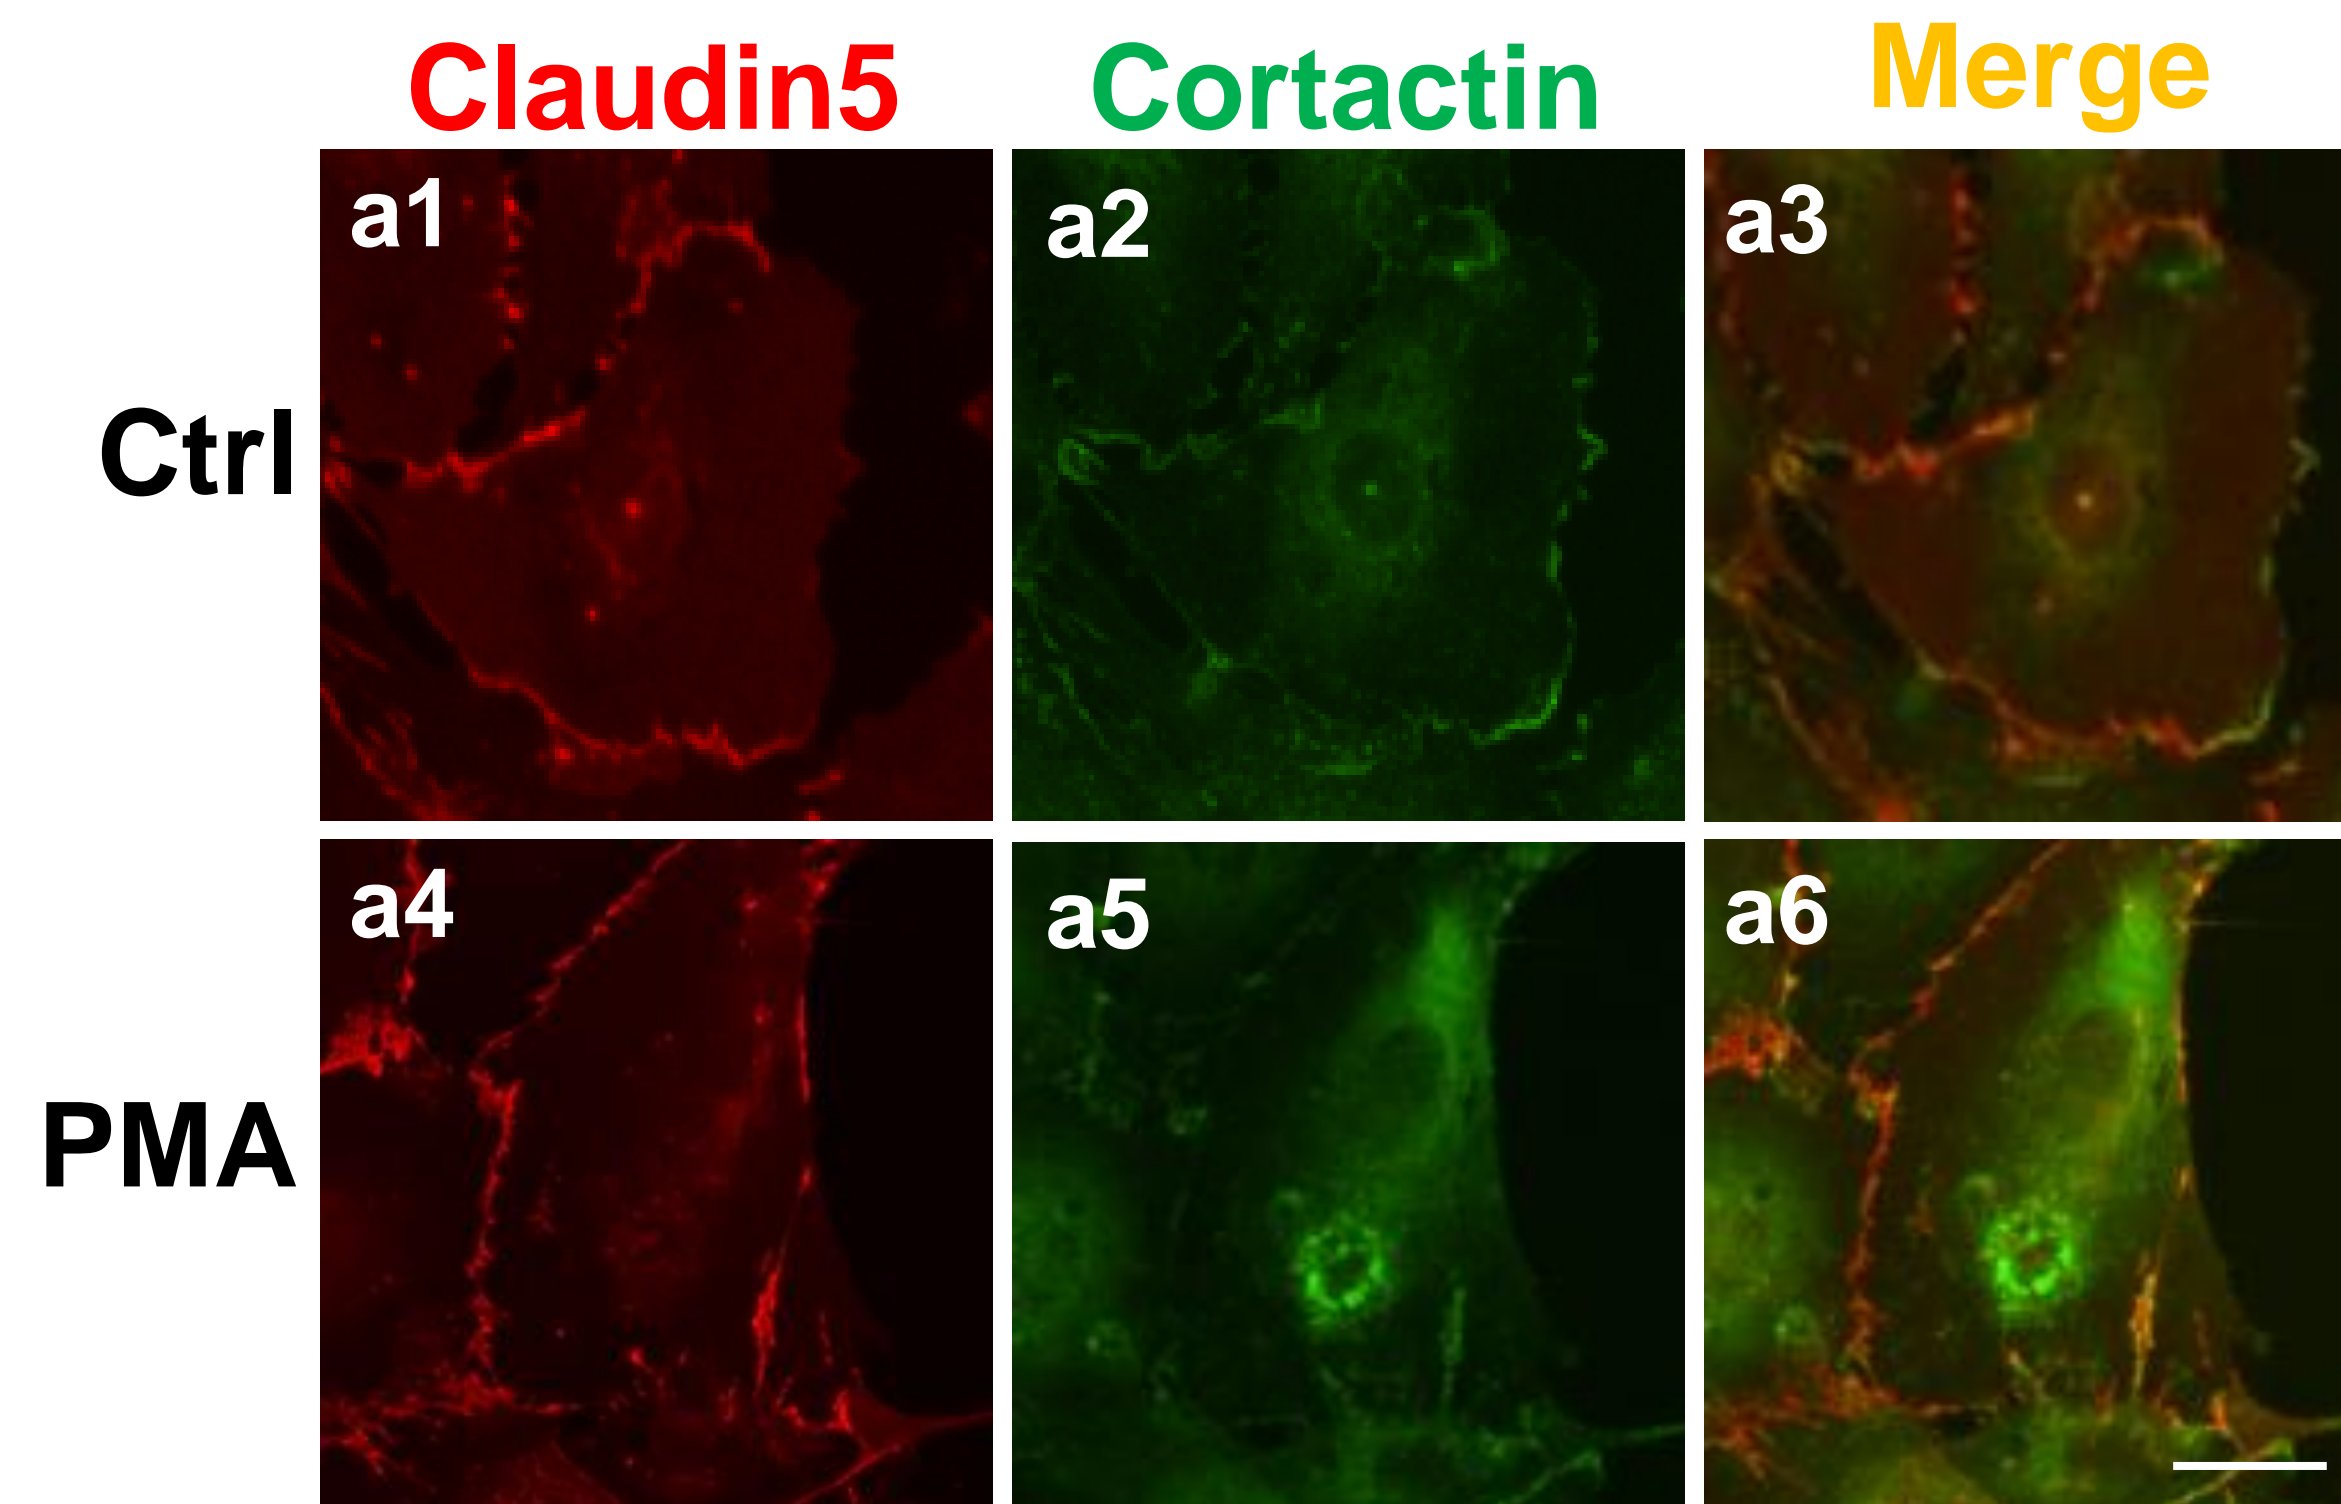

**Supplemental Figure 3. Claudin 5 dose not localize at induced podosomes**

**a**

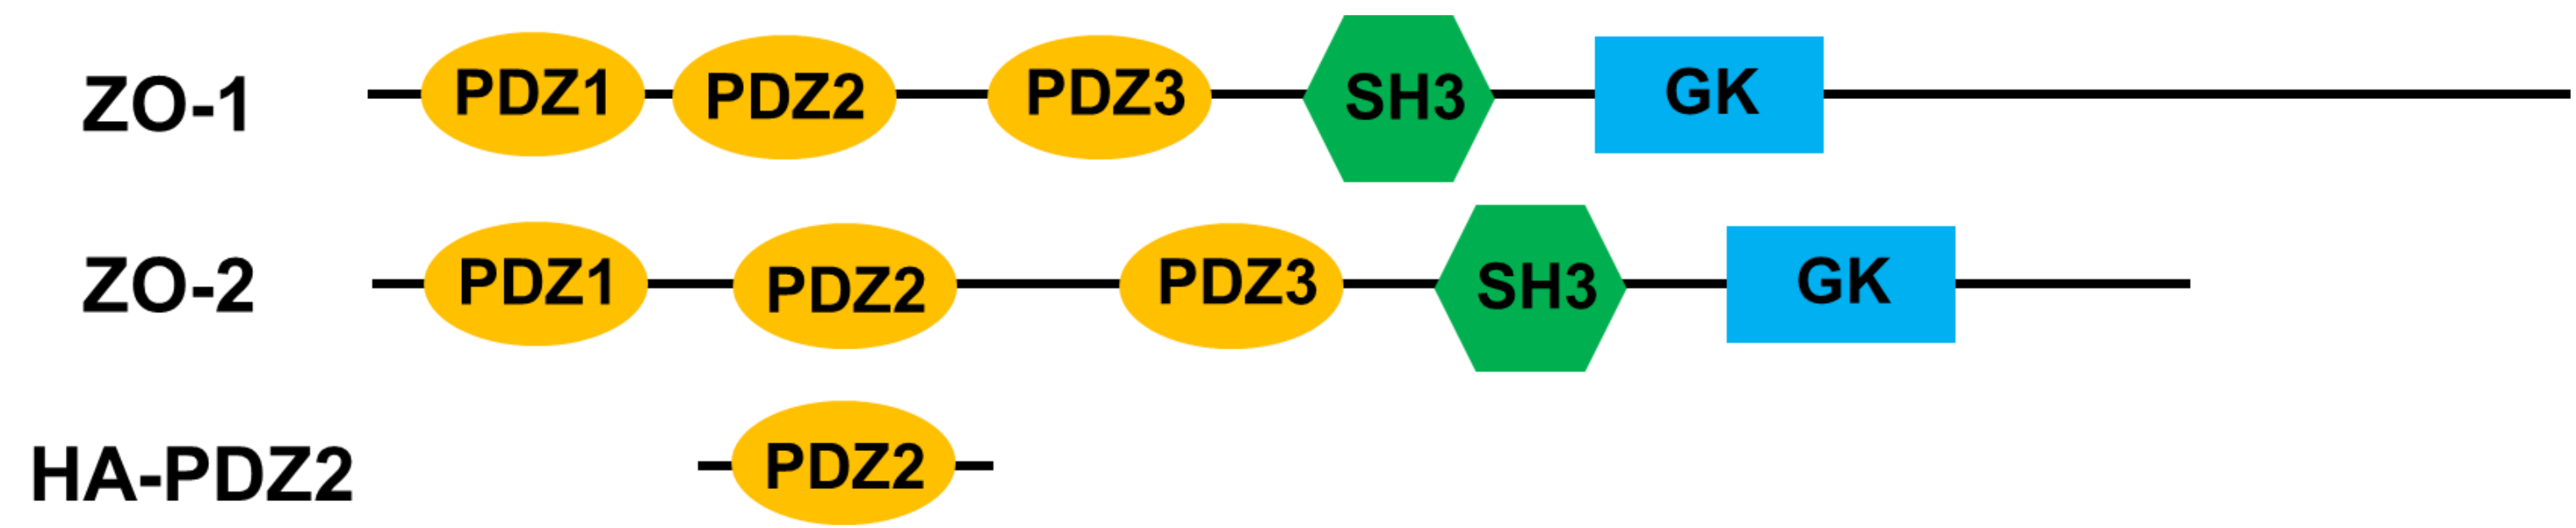

**b**

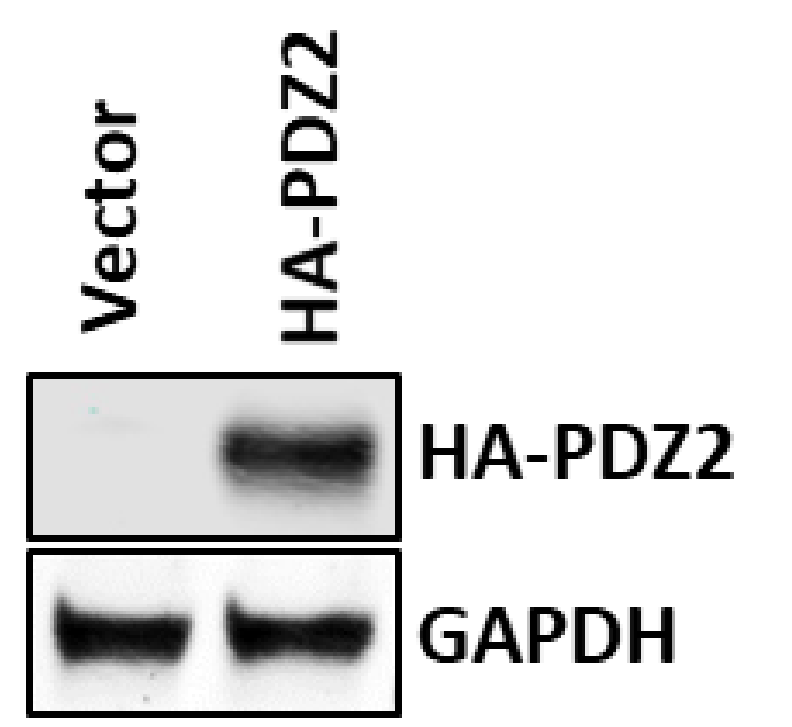

**Supplemental Figure 4. Expression of a CMV5-HA-ZO-1-PDZ2 construct**

**a**

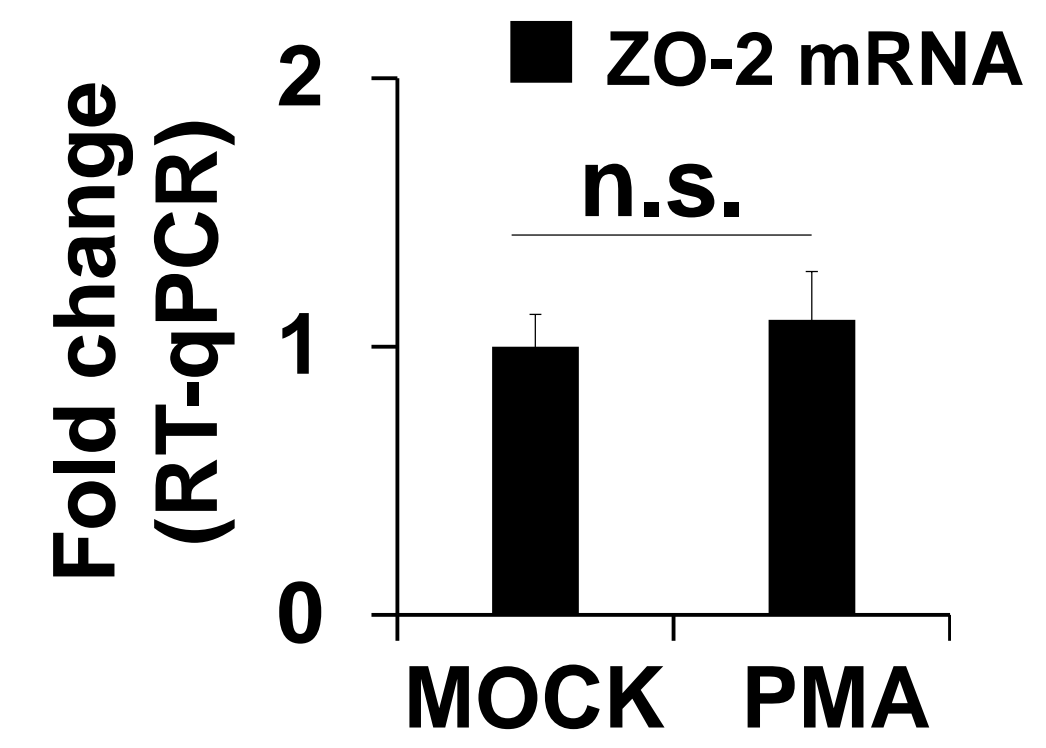

**b**

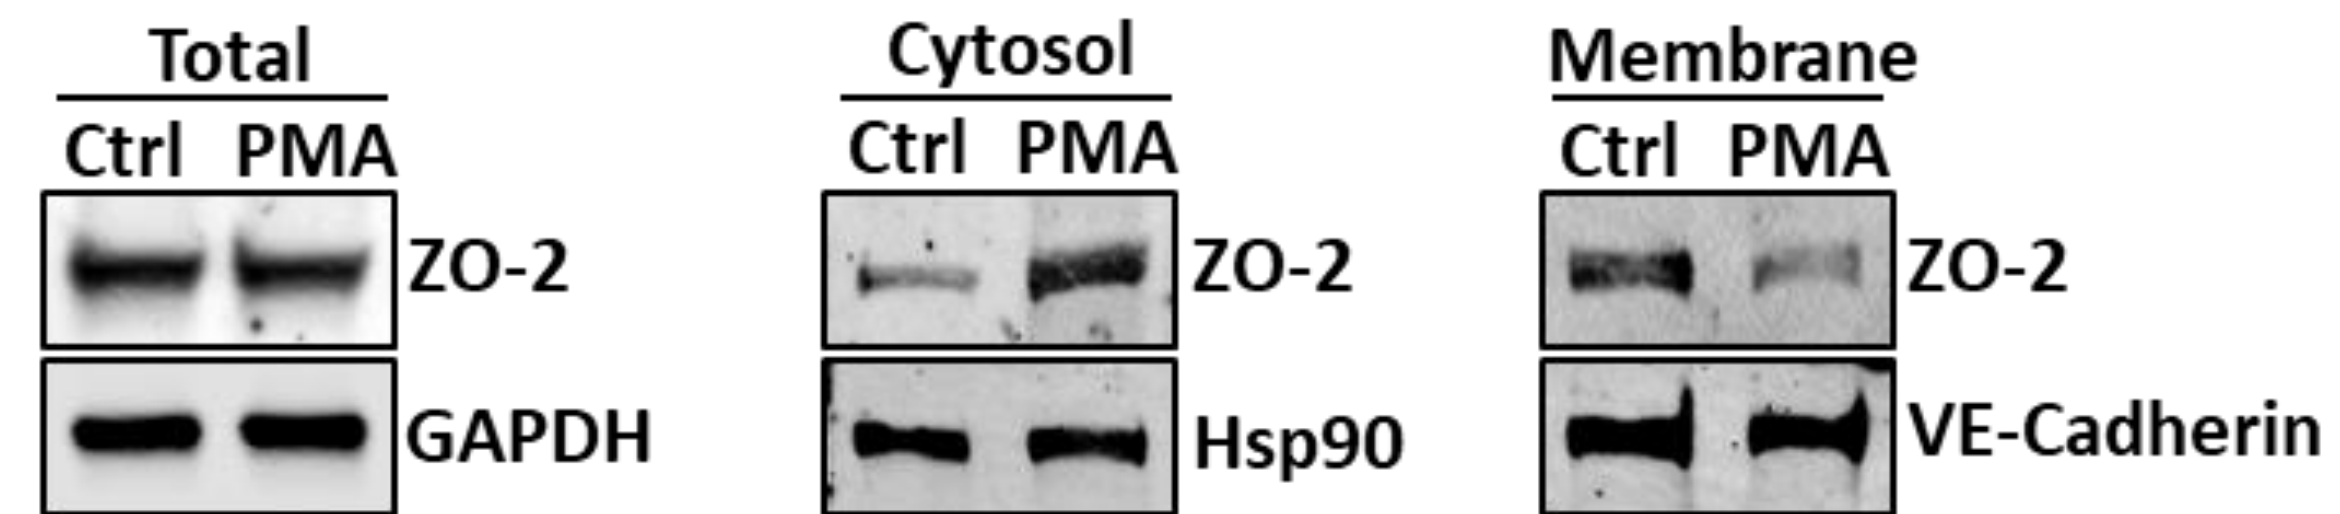

**Supplemental Figure 5. ZO-2 relocates from plasma membrane into podosomes**

**a**

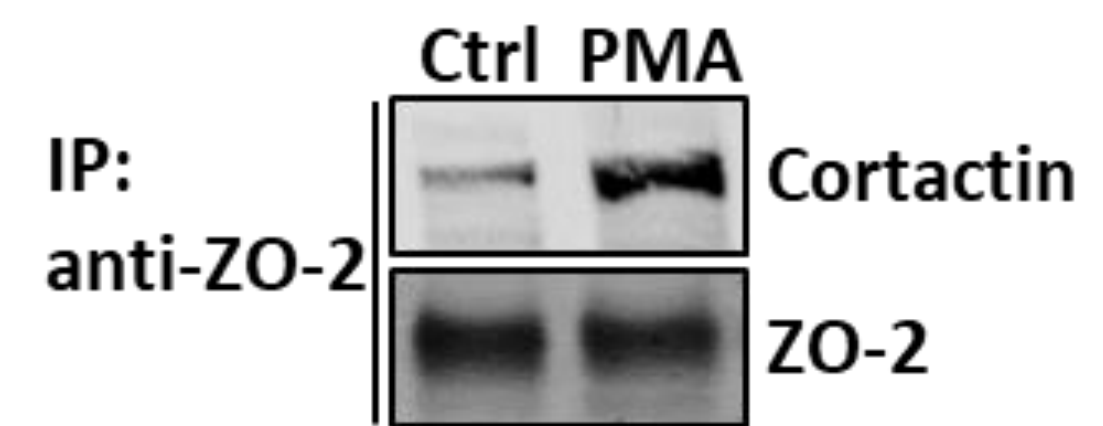

**b**

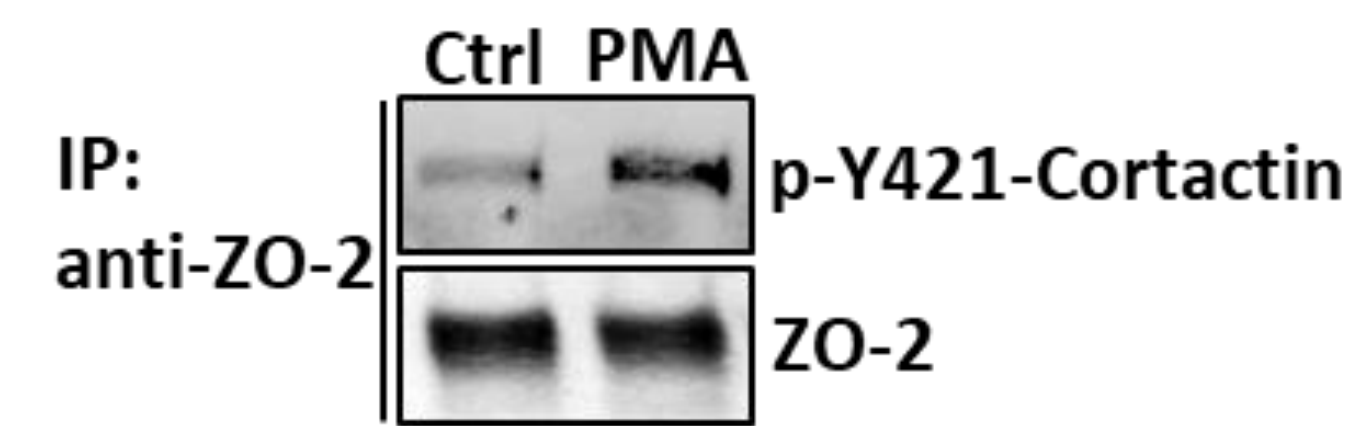

**Supplemental Figure 6. PMA treatment increases the physical interaction between ZO-2 and cortactin**

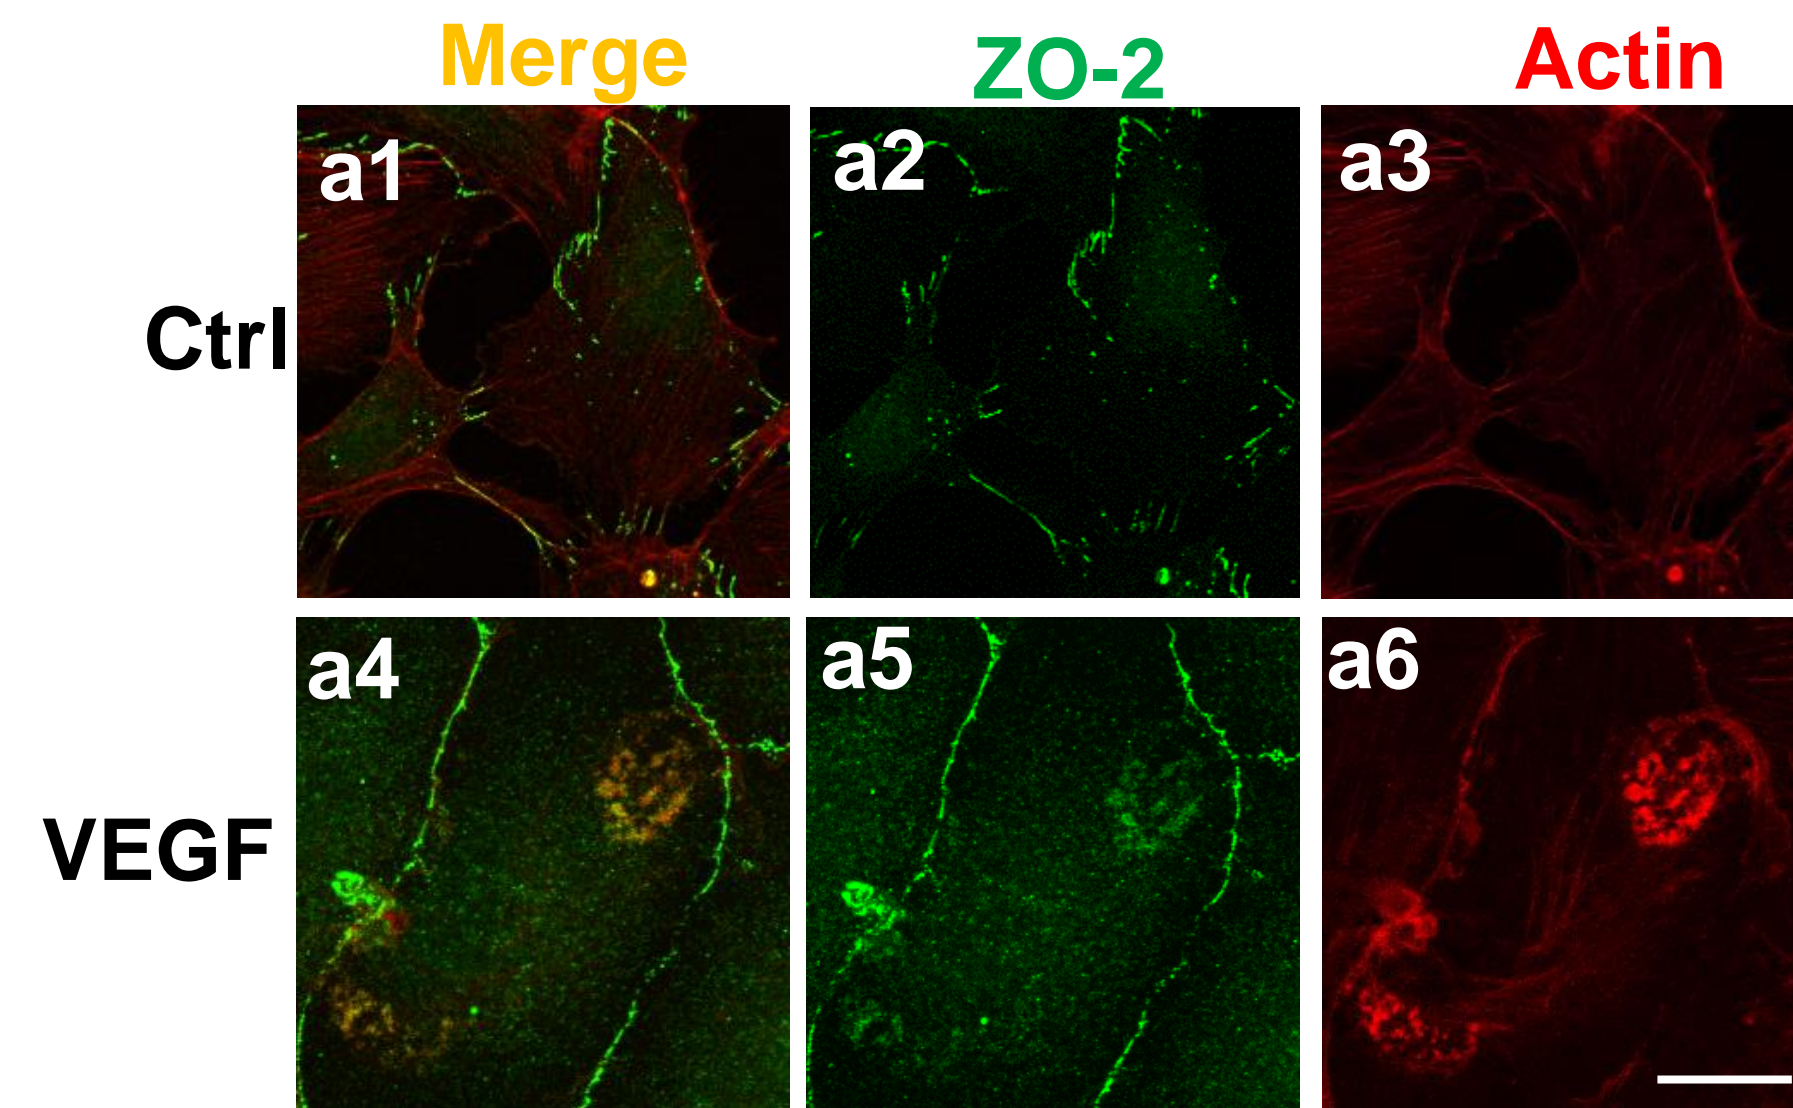

**Supplemental Figure 7. VEGF treatment induces ZO-2 localization at podosomes**
